# Supplementary material for: Dual photothermal nanocomposites for drug-resistant infectious wound management
Source: Royal Society of Chemistry journal article supplement (doi:10.1039/d2nr01998a), 2022-01-01
Supplement: d2nr01998a1.pdf [file d2nr01998a1.pdf]

## Supporting information for

### Dual photothermal nanocomposites for drug-resistant infectious wound management

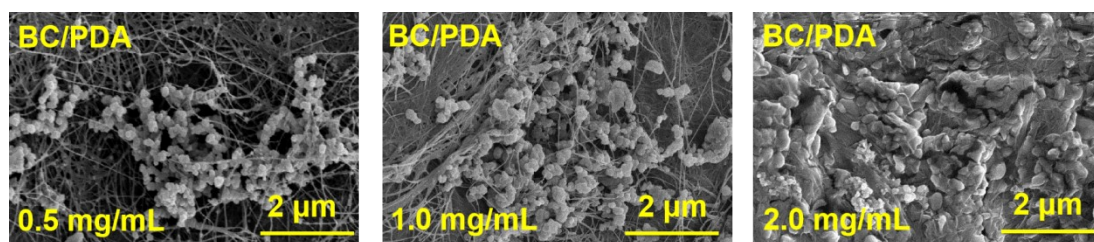

**Figure S1.** Representative SEM images of BC/PDA samples fabricated with different PDA concentrations (0.5, 1.0 and 2.0 mg/mL of dopamine).

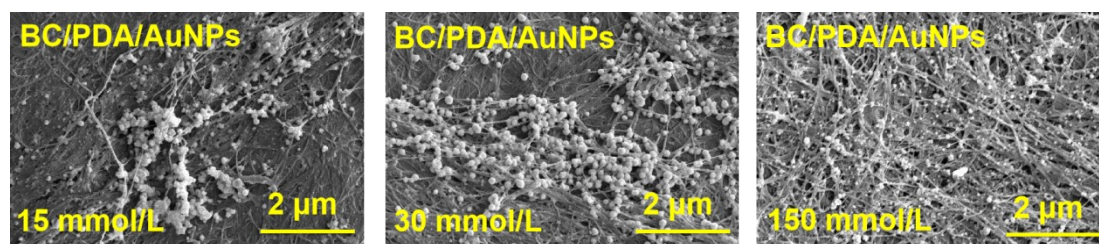

**Figure S2.** Representative SEM images of BC/PDA/AuNPs membranes containing various percentage of AuNPs (15, 30 and 150 mmol/L of chloroauric acid).

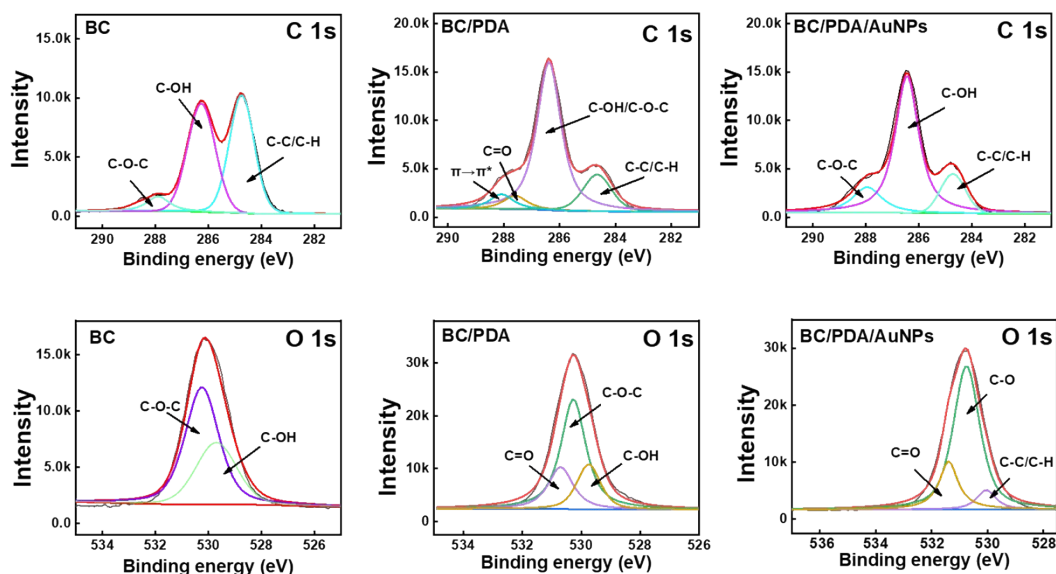

**Figure S3.** The high-resolution C 1s and O 1s XPS spectra of BC, BC/PDA and BC/PDA/AuNPs.

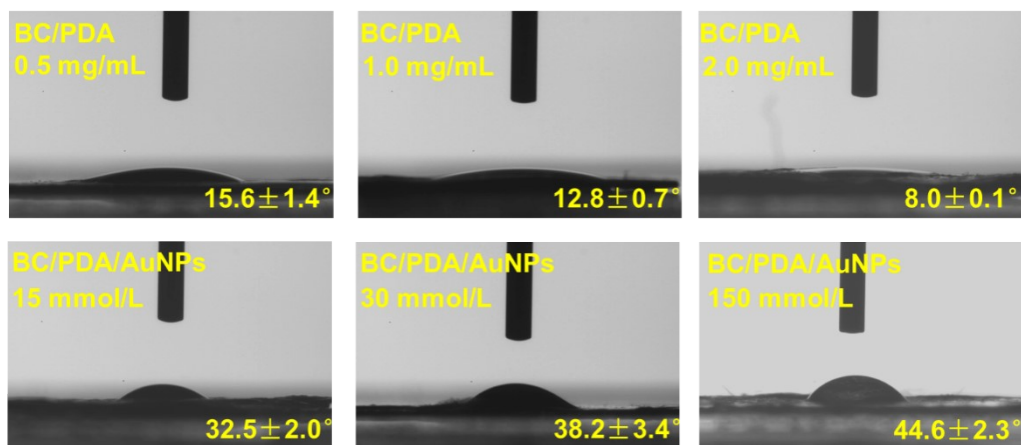

**Figure S4.** Water contact angles of BC/PDA samples fabricated with different concentration PDA solutions, and BC/PDA/AuNPs samples incorporated with various concentrations (15, 30 and 150 mmol/L of chloroauric acid) of AuNPs.

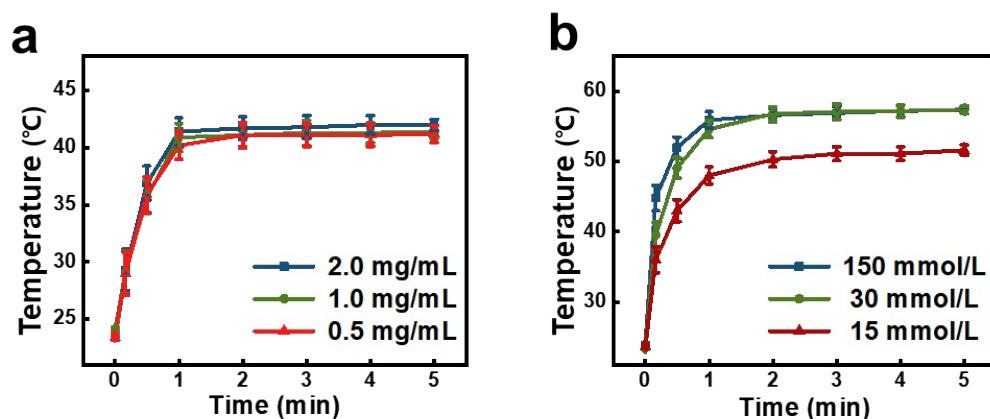

**Figure S5.** (a) Temperature profiles of the BC/PDA samples fabricated with different PDA concentrations after being irradiated for 5 min under 0.25 W/cm<sup>2</sup>. (b) Temperature profiles of the BC/PDA/AuNPs samples incorporated with AuNPs at various concentrations (15, 30 and 150 mmol/L of chloroauric acid) after being irradiated for 5 min under 0.25 W/cm<sup>2</sup>.

**Table 1.** Sequences of primers used in this study

| Gene          | Forward primer           | Reverse primer            |
|---------------|--------------------------|---------------------------|
| TNF- $\alpha$ | GGGACAGTGACCTGGACTGT     | CTCCCTTTGCAGAACTCAGG      |
| IL-1 $\beta$  | GAGCCCATCCTCTGTGTCTC     | AGCTCATATGGGTCCGACAG      |
| bFGF          | GAAGAGCGACCCTCACAT       | CGTTTCAGTGCCACATACCA<br>A |
| VEGF          | AGGCTGCTGTAACGATGAA<br>G | TATGTGCTGGCTTTGGTGAG      |
